# Supplementary material for: Morphology controlled growth of ZnAl-layered double hydroxide and ZnO nanorod hybrid nanostructures by solution method
Source: Royal Society of Chemistry journal article supplement (doi:10.1039/c5ra10374f), 2015-01-01
Supplement: c5ra10374f1.pdf [file c5ra10374f1.pdf]

## Supplementary Materials for RSC Advances

This journal is (c) The Royal Society of Chemistry 2015

### Morphology controlled growth of ZnAl-layered double hydroxide and ZnO nanorod hybrid nanostructures by solution method

Seong-Ho Baek<sup>1#</sup>, Gwang-Hee Nam<sup>2#</sup>, and Il-Kyu Park<sup>2\*</sup>

<sup>1</sup>Energy Research Division, Daegu Gyeongbuk Institute of Science & Technology (DGIST), Daegu 711-873, South Korea

<sup>2</sup>Department of Electronic Engineering, Yeungnam University, Gyeongbuk 712-749, South Korea

#### 1. Fourier transform infrared (FTIR) spectroscopy results

Fourier transform infrared spectroscopy (FTIR, Thermo Scientific, Continuum) was measured for the ZnAl-layered double hydroxide (LDH) and ZnO nanorod (NR) structures on the ZnO/Al<sub>2</sub>O<sub>3</sub> double seed layer with ZnO thicknesses of 0 and 15 nm, respectively. The ZnO NRs (blue line) shows no trace of the vibration mode from the chemicals, while that from the ZnAl-LDH shows some bands from the chemical species. It should be noted that the ZnAl-LDH shows band near 1381 cm<sup>-1</sup>. The appearance of a strong band near 1381 cm<sup>-1</sup> can be assigned to the  $\nu_3$  nitrate group, NO<sub>3</sub><sup>-</sup>, the counter anion in the ZnAl-LDH [P. Fu, K. Xu, H. Song, G. Chen, J. Yang and Y. Niu, *J. Mater. Chem.*, 2010, **20**, 3869-3876.].

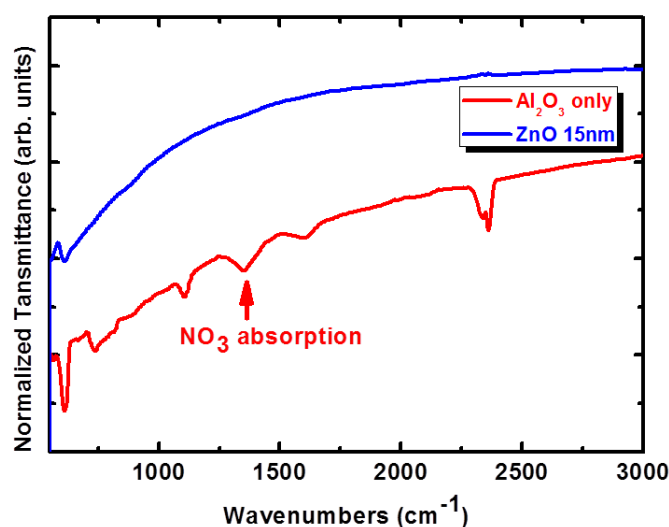

**Figure S1.** FTIR spectra of the ZnO NRs and ZnAl-LDH hybrid structures on the ZnO/Al<sub>2</sub>O<sub>3</sub> double seed

<sup>#</sup> These authors contributed equally to this work.

\*Corresponding author. E-mail address: ikpark@ynu.ac.kr

layer with ZnO thicknesses of 0 and 15 nm.

## 2. Inductively coupled plasma mass spectrometry (ICP-MS)

Inductively coupled plasma mass spectrometry (ICP-MS; iCAP-Qs, Thermo Scientific) was measured for the ZnAl-LDH grown on the  $\text{Al}_2\text{O}_3/\text{ZnO}$  double seed layer with ZnO layer thicknesses of 0 nm. The sample was prepared by dissolving in an aqua regia consisting of hydrochloric acid (HCl) and nitric acid ( $\text{HNO}_3$ ) with 3:1 ratio. The dissolved solution was diluted with DI water for analysis. The results show that the samples contain Al and Zn with 20 and 41wt%, respectively. Therefore, the Zn/Al ratio in the ZnAl-LDH in our sample was around 2, indicating that the formula of the LDH compounds is  $[\text{Zn}_2\text{Al}(\text{OH})_2][\text{NO}_3^- \cdot \text{mH}_2\text{O}]$ .

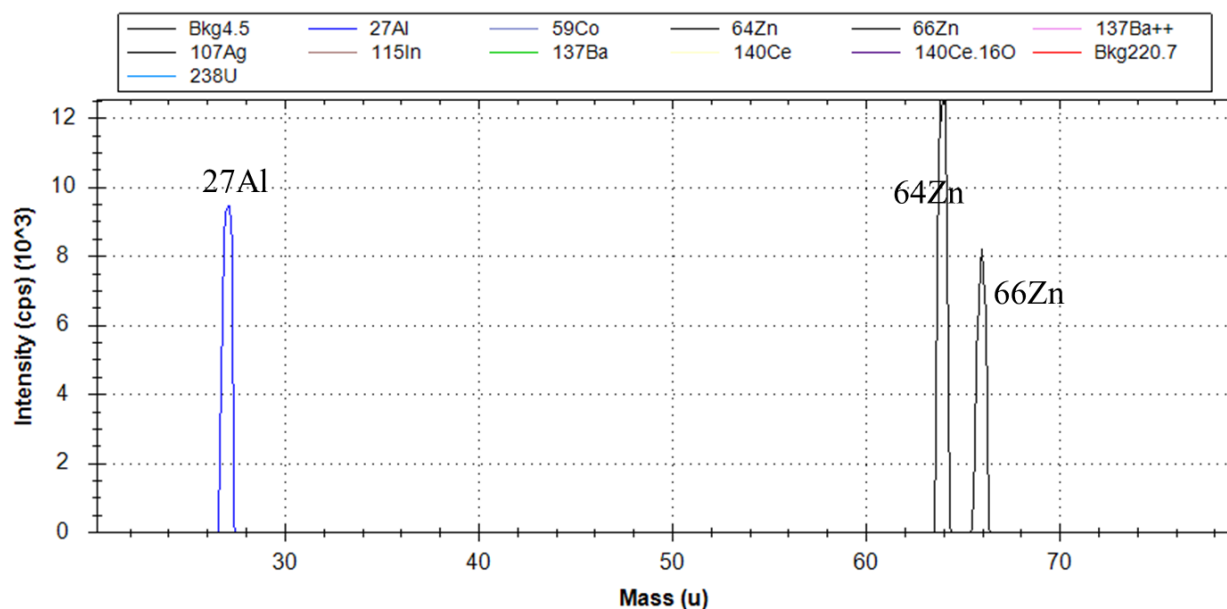

**Figure S2.** ICP-MS spectra of the ZnAl-LDH grown on the  $\text{Al}_2\text{O}_3/\text{ZnO}$  double seed layer with ZnO layer thicknesses of 0 nm.
